# Supplementary material
Source: PubMed Central journal article supplement (PMC1525144)
Supplement: 7400736-s1.pdf [file 7400736-s1.pdf]

## Supplementary Results

### Differentiation parameters of T2ECs

We followed the progression of differentiation by monitoring the surface expression of molecules characteristic of either immature or mature erythrocytes. As expected, a strong reduction in the expression of the immature-specific MEP26 antigen and an increase in the frequency of cells expressing the mature-specific JS4 antigen were detected after 48 hrs of differentiation (Figure S1, panel A). Furthermore, the percentage of haemoglobin expressing cells, as detected by benzidine staining, reached 30 to 40% after two days of differentiation (data not shown). Accumulation of haemoglobin more specifically reflected the transcriptional induction of  $\beta$ H and  $\beta$ A inside the  $\beta$ -globin cluster, as  $\beta$ H and  $\beta$ A transcripts increased 4 to 6 fold whereas embryonic gene transcripts increased only 2 fold (Figure S1, panel B). Cell cycle analysis by flow cytometry before and after 48 hrs of differentiation showed that both populations contained the same proportion of G1, S and G2 cells (Figure S1, panel C).

## Supplementary Methods

### Cell culture

Self-renewing T2ECs and differentiating T2ECs were generated from SPAFAS white leghorn chicken (PA12 line from INRA, Tours, France) as previously described (Damiola et al., 2004; Dazy et al., 2003; Gandrillon et al., 1999). Because large amount of cells were necessary to perform replication origin localization, we made slight modifications. Mainly exponentially self-renewing T2ECs were suspended at  $3-6 \times 10^5$  cells/ml in the differentiation medium, which includes anaemic chicken serum (ACS). Different batches of Anaemic Chicken Serum (ACS) were prepared and tested for the minimal concentration required to induce robust cell differentiation, as monitored by blue acidic benzidine staining of haemoglobin as described (Quadrillion and Samara, 1998). To control for potential variability associated with ACS we decided to differentiate two independent preparations of T2ECs using two batches of ACS effective at very different concentrations (batch 1, 5% ACS; batch 2, 15% ACS). We observed that the replication initiation profile of both undifferentiated and differentiating cells was very reproducible (compare Fig 1A and 1C).

### Flow cytometric analysis

We performed cell surface antigen detection using either MEP26 (early progenitors) or JS4 (late progenitors) antibodies as previously described (Dazy et al., 2003; Gandrillon et al., 1999). Cell cycle analysis was performed on cells washed in PBS, fixed in 75% cold ethanol, treated with RNase at 1mg/ml and stained with propidium iodide at a final concentration of 50 µg/ml. Fluorescence data acquisition was done using a FACSCalibur flow cytometer and analysis was performed using the CellQuest program (both from Becton-Dickinson). MEP26 antibody was a kind gift of Dr Kelly McNagny.

#### Chromatin Immunoprecipitation

25x10<sup>6</sup> cells were fixed 10 min at room temperature with 0.1 volume of fixation buffer (PBS 11% formaldehyde 0.1M NaCl, 0.05M Hepes pH 7.9). Fixation was stopped by adding glycine at a final concentration of 0.125M. Cells were then washed twice in cold PBS. The pellet was suspended 10 min at 4°C in 2mL of lysis buffer (50mM Tris-HCl pH8.0, 10mM EDTA pH8.0, 1%SDS, 1/25 complete mini EDTA-free protease inhibitor cocktail (Boehringer)). The lysed cell suspension was frozen quickly in liquid nitrogen and kept at -80°C before chromatin sonication. Sonication conditions were established to shear DNA to an average size of 300 bp. Immunoprecipitation was performed overnight at 4°C in 1ml of 20mM Tris-HCl pH 8.0, 2mM EDTA, 150 mM NaCl and 0,25% Triton-X100 on an amount of chromatin corresponding to 10 µg of DNA using 5 µl of anti-diacetylated K9&K14 H3 antibodies (Upstate Biotech). Immunocomplexes were recovered and processed as described previously (Chen et al., 1999). Two independent immunoprecipitations were performed on two independent batches of undifferentiated or differentiating cells. Real-time quantitative PCR was performed by using a LightCycler and the QuantiTect SYBR GreenPCR Mix in accordance with the recommendations of the manufacturer (QIAGEN). Primer pair 5 was used as a standard in each PCR experiment.

#### Nascent strands preparation and quantification

Nascent strands were purified as described previously (Prioleau et al., 2003). Quantitative real-time PCR was performed by using a LightCycler and the QuantiTect SYBR GreenPCR Mix in accordance with the recommendations of the manufacturer (QIAGEN). Primer pair 24 was used as a standard in each PCR experiment. Primers were synthesized for each of the target sites to be amplified (table 1).

## RNA isolation and cDNA synthesis

RNA extraction and reverse transcription assay were performed as previously described (Damiola et al., 2004; Dazy et al., 2003; Gandrillon et al., 1999). Sequences of the primers used for real-time PCR were the following: Beta-globin Adult GAACACCTTCTCCCAACTGTCC3' and CTTTGGTGCTGGTGCTTAGTGG;

Beta-globin Hatching TTTGCCAGCTGAGCAAAGCTGC and  
CTGCCAGGCAGCCTGGCTGGCG; Beta-globin rho

GAGAACTTCAGGCTCCTGGGGAAC and ACTTTCACACTGTGTCCTGCTCTGG;

Beta-globin epsilon GAACACCTACGCCAAGCTGTTCG and  
TTGGGGGCTATGGCCACGGCTG.

The ratio of expression (R) of each beta-globin gene was calculated as described (Damiola et al., 2004) using as a standard the invariant BBC1 gene (Dazy et al., 2003). The biological condition of reference was self-renewing T2ECs. The tested biological conditions were 24h or 48h differentiating T2ECs. Similar results were obtained with another invariant gene EF1 (data not shown) (Damiola et al., 2004).

## Supplementary References

Chen, H., Lin, R.J., Xie, W., Wilpitz, D. and Evans, R.M. (1999) Regulation of hormone-induced histone hyperacetylation and gene activation via acetylation of an acetylase. *Cell*, 98, 675-686.

Damiola, F., Keime, C., Gonin-Giraud, S., Dazy, S. and Gandrillon, O. (2004) Global transcription analysis of immature avian erythrocytic progenitors: from self-renewal to differentiation. *Oncogene*, 23, 7628-7643.

Dazy, S., Damiola, F., Parisey, N., Beug, H. and Gandrillon, O. (2003) The MEK-1/ERKs signalling pathway is differentially involved in the self-renewal of early and late avian erythroid progenitor cells. *Oncogene*, 22, 9205-9216.

Gandrillon, O. and Samarut, J. (1998) Role of the different RAR isoforms in controlling the erythrocytic differentiation sequence. Interference with the v-erbA and p135gag-myb-ets nuclear oncogenes. *Oncogene*, 16, 563-574.

## Supplementary Figure Legend

### Figure S1: Differentiation parameters of T2ECs.

(A) Expression of differentiation antigens. T2ECs grown for 48 hours in self-renewing medium and for 24 and 48 hours in differentiating medium were analyzed by cell sorting for the expression of the immature specific MEP26 (black line) and the mature-specific JS4

antigens (Dark gray shaded profiles). Fluorescence profiles of cells incubated with FITC labelled goat anti-mouse secondary antibody only are indicated (Pale grey shaded profiles) as a control of staining. (B) Expression of embryonic ( $\beta$ -rho,  $\beta$ -epsilon, upper panels) and adult ( $\beta$ H,  $\beta$ A, bottom panels) globin genes in differentiating T2ECs. Quantifications of the  $\beta$ -globin transcripts were performed by real-time PCR on the same batches of cells (1 and 2 white numbers) as used in Fig. 1-3. The ratio of  $\beta$ -globin transcripts present in differentiating T2ECs (24h, pale grey; 48h dark grey) to transcripts present in self-renewing T2ECs are shown. Each PCR quantitation was performed in duplicate. (C) Cell cycle analysis. Histograms of propidium iodide (PI) staining intensity of self-renewing and differentiating T2ECs in batches 1 and 2 (white numbers).

**Figure S2: 1-1.5 Kb Nascent enrichments in differentiated T2ECs confirm origins found with longer nascent strands:**

1.0-1.5 Kb nascent strands prepared from differentiated cells (batch 1) were quantified by real-time PCR. The scale corresponds to fold of enrichments over the background. The abscissa scale is map position (nucleotide number). Black and gray arrows in the graph point towards constitutive and differentiation-activated origins, respectively. The positions of primer pairs 10, 20 and 30 are shown below and primer pairs 21', 23'' and 29 are indicated inside the graph.

# Figure S1

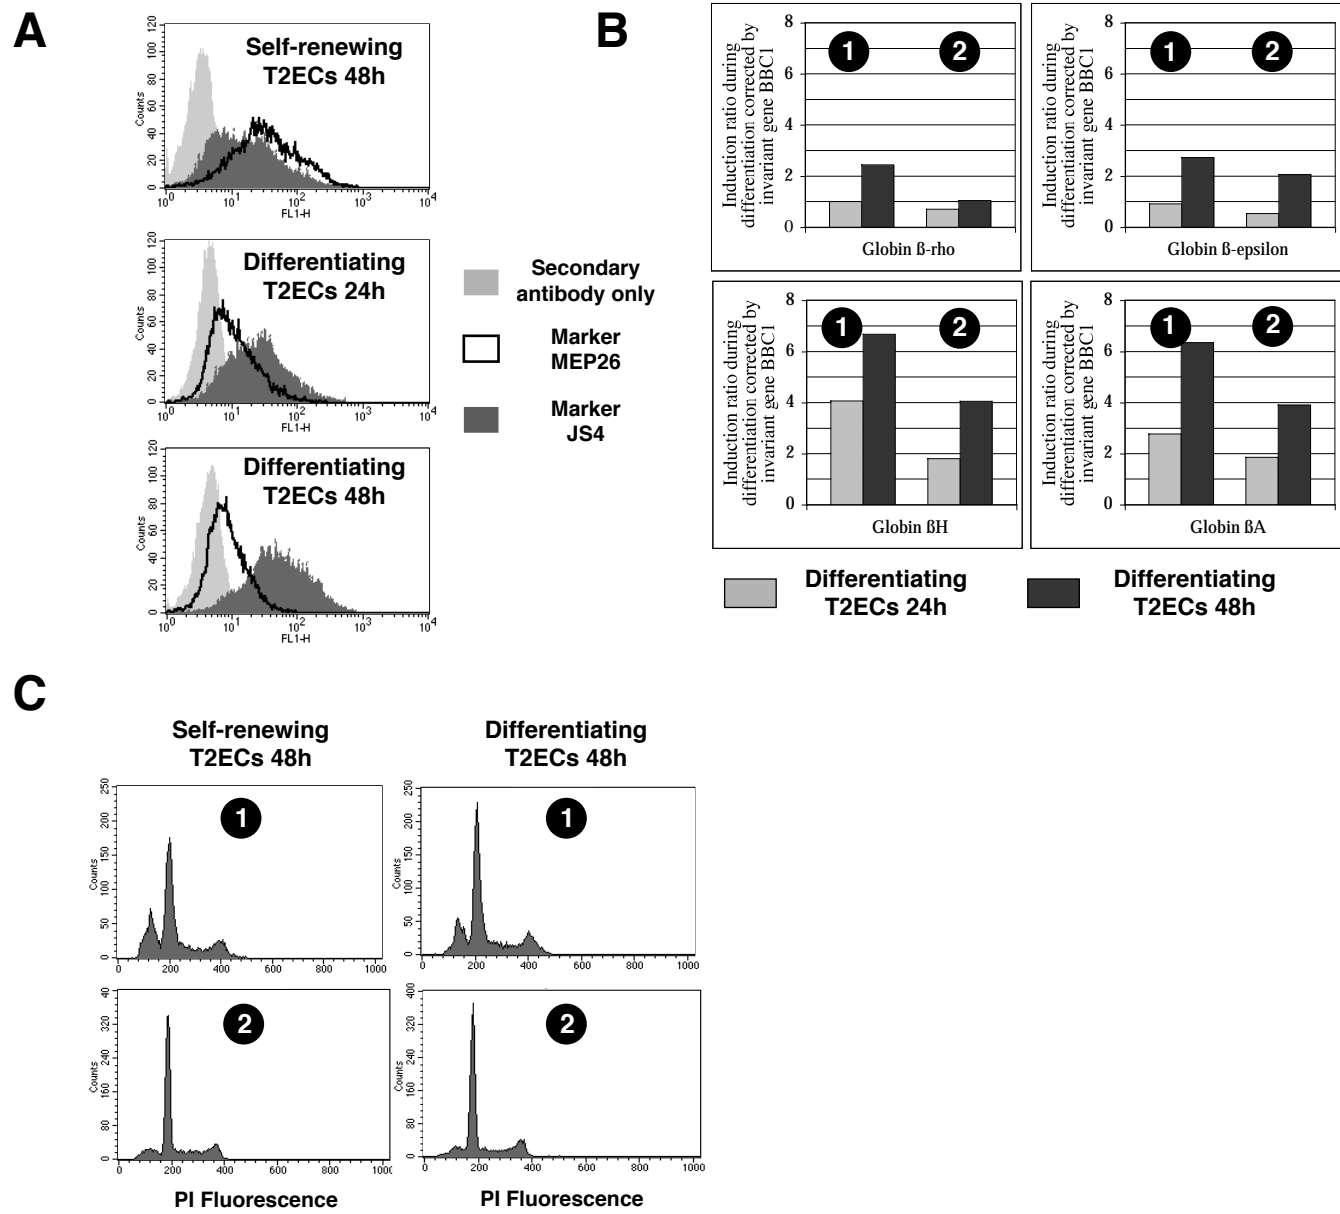

Figure S2

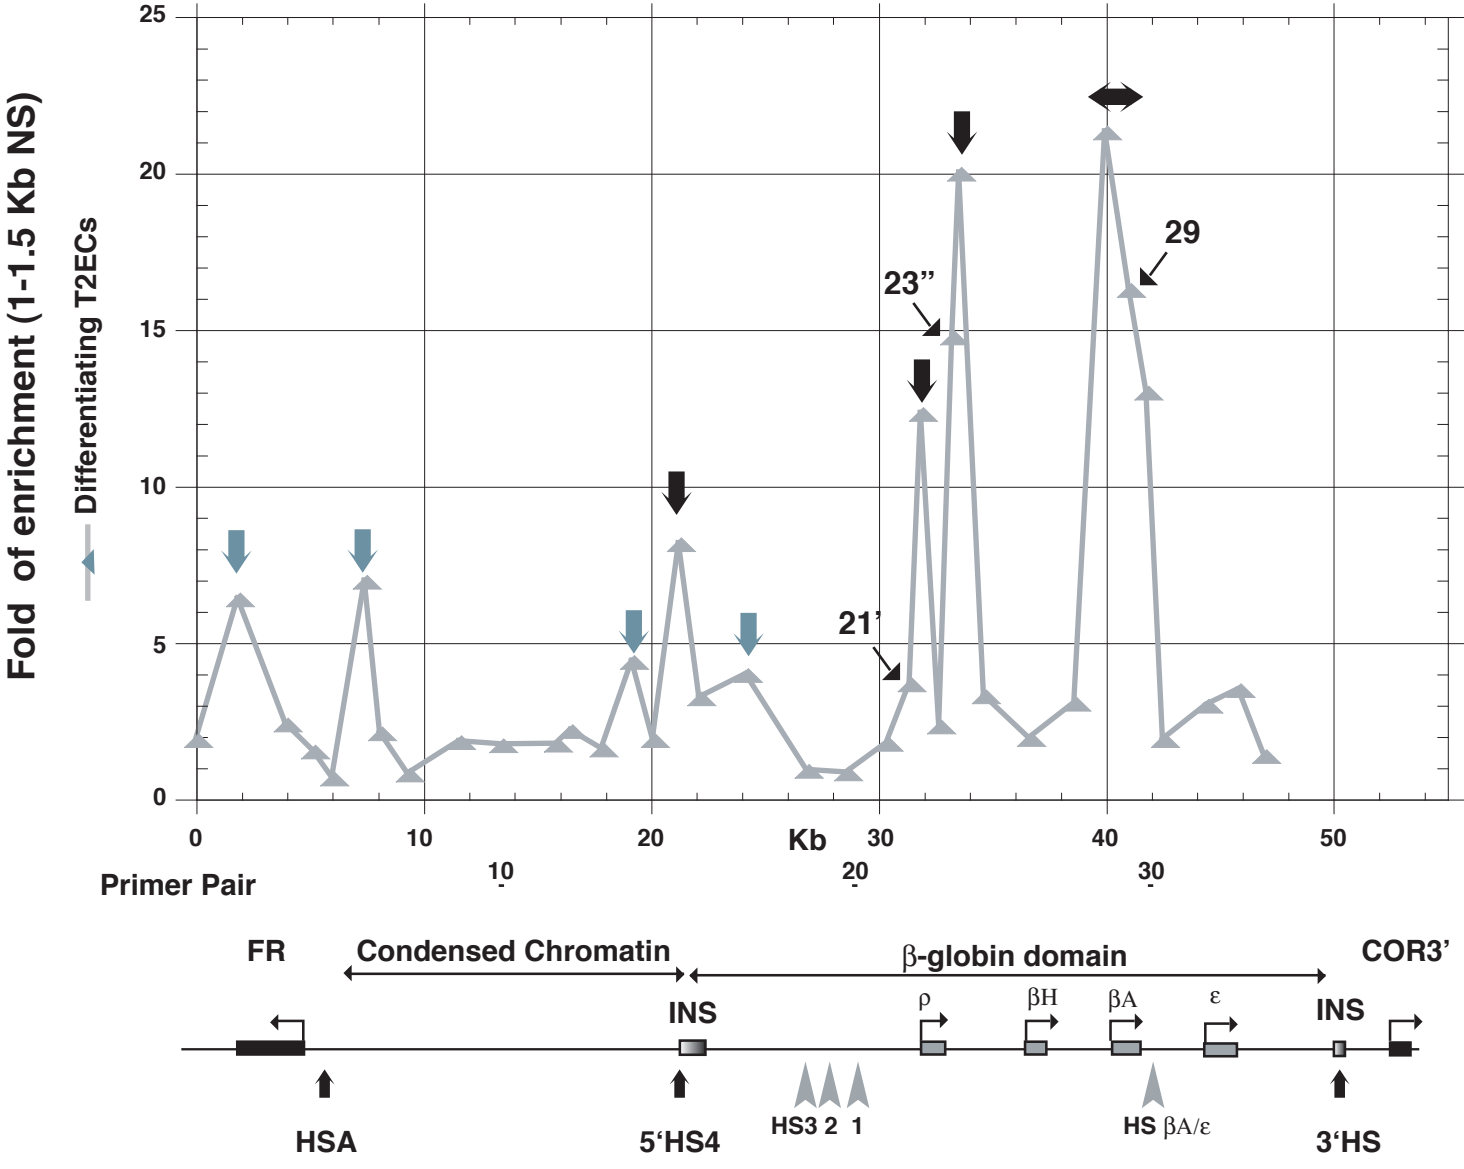

**Supplementary Table 1 : List of primer sequences**

| <b>Name</b><br>Sequence 5' to 3' | <b>Map position</b> | <b>Name</b><br>Sequence 5' to 3' | <b>Map position</b> |
|----------------------------------|---------------------|----------------------------------|---------------------|
| <b>Primers 1</b>                 |                     | <b>Primers 11</b>                |                     |
| TGAGCTGCTGACTCTGCCCA             | 80                  | TGGCACCGATGGGATCACAT             | 15895               |
| CATGTCCTCATGGCCAACAC             | 382                 | CACTGATACTGCAGCCTCTT             | 16189               |
| <b>Primers 2</b>                 |                     | <b>Primers 12</b>                |                     |
| CAATGCAGCTCTGGCAGTCT             | 1904                | GGTGTTC AATAATCAGACTGTC          | 16535               |
| GTTACTCGTGTCCCTGCATG             | 2075                | TCACATTT CAGCTGGCGCTC            | 16824               |
| <b>Primers 3</b>                 |                     | <b>Primers 13</b>                |                     |
| CAGCAAGATGGTGTGAAGG              | 4016                | TCTCACTGTGCAGATGATGG             | 17905               |
| CAGTGGTGTGGGTAATTGGA             | 4322                | CATGGTGT CATCACAGCATC            | 18159               |
| <b>Primers 4</b>                 |                     | <b>Primers 14</b>                |                     |
| GCCTCCTGACACAGCAGAGC             | 5217                | GGATCCTGAAGCTGTTTGGC             | 19230               |
| GCAGGTTTGAGGCAAGTTAG             | 5512                | CTCTGCTGGGTTTCAGCAC              | 19363               |
| <b>Primers 5</b>                 |                     | <b>Primers 15</b>                |                     |
| CTGAATGGTCTTTGTGGTCCC            | 6064                | ACGGGATGGTGAAGGCACAG             | 20165               |
| CTTGCTGTGGGAGACCTGCT             | 6348                | TTAGCTCCCATTCCCCCACA             | 20472               |
| <b>Primers 6</b>                 |                     | <b>Primers 16</b>                |                     |
| TGGGAGATAATTGTTAGCCAC            | 7499                | GCCTCCAGGAAACCACTC               | 21423               |
| TATGCTGGGAACAGCTATAC             | 7651                | GACCTTCCAGGAAAGCCTG              | 21538               |
| <b>Primers 7</b>                 |                     | <b>Primers 17</b>                |                     |
| GCCATACCCATTCACTCCAT             | 8166                | GGACGTGGACATGCAGGTG              | 22200               |
| AATGGGACACGCAGTCCCAG             | 8391                | CCAGCCTTCATGATTTGACG             | 22508               |
| <b>Primers 8</b>                 |                     | <b>Primers 18</b>                |                     |
| GCATCCTTCATCCAGCTG               | 9380                | TGGGCAGTTTTCTAAGGGAA             | 24240               |
| CAGTGAGCAGACTGTGAAGC             | 9533                | GTGCTGGCAGGGCATTCCAA             | 24554               |
| <b>Primers 9</b>                 |                     | <b>Primers 18'</b>               |                     |
| CTGTGGTCTGGTTTGTGG               | 11649               | TGAGAGCTGAGCTGCTCCTG             | 24720               |
| CAGCCTCTCCACTCATGCAC             | 11956               | CAGACTGCAGCTGAAGGCA              | 24911               |
| <b>Primers 10</b>                |                     | <b>Primers 19</b>                |                     |
| CTGAGCTGTGACAGTGCC               | 13489               | CAGCTCTGAGCACAGCACTG             | 26910               |
| AATGGTCTTTGCCTGGGTCA             | 13652               | CAGGGAATTCCTTCTGGGG              | 27216               |

**Name**                      **Map position**  
Sequence 5' to 3'

**Primers 20**

CTGTCTGAATATCCTGGCTC    28642  
GTGATTCAATGTCAGGCACT    29 021

**Primers 21**

GTGAGAGGGGCACTCCAGG    30441  
GCAGTGCTCCGATAATGCC    30739

**Primers 21'**

TGCACAGGGGCACCATTTTG    31444  
CCTTGCATAAGGACAGCAGG    31610

**Primers 22**

GAAGGGTGAGGGAAGTGCC    31941  
TCAGTGTGCACAAGGTGTGG    32211

**Primers 23**

GAACACCTACGCCAAGCTGT    32738  
TGCTGCACCTTGTTCCACAC    32925

**Primers 23'**

CAGCAGATGAAGGAGGGAAG    32920  
GTCAGTTCATGTCTGCCTG    33060

**Primers 23''**

TTACCCCATTGCTCCCCTTC    33317  
ACAGCCCTGAGCCCTCTTTC    33600

**Primers 24**

GACGGTCAGGTTTGCCAAAG    33620  
TCCTGAGGATACGTTTTTCAG    33887

**Primers 25**

CTGGGAGCAAAGACACTGAC    34701  
TGGTCACTCTGATTGCAGCA    34869

**Primers 26**

GATACGCACTGAGCTCTCGT    36700  
CACCCATGATCTCGTAGCCA    37000

**Primers 27**

GAACAAGTCATTGCACAACGG    38690  
GGCAGTGAAACCAAGTGCTC    38994

**Name**                      **Map position**  
Sequence 5' to 3'

**Primers 27'**

GACAGAGCACTTGGTTTCAC    38970  
GATGCTGCGAGCCACATCTG    39208

**Primers 27''**

GAGTGCTGTGGTTTGGAACT    39870  
CAGCTCTGCAGCTCTATAC    40010

**Primers 28**

TGGTGTGGCCACGGATCTG    40040  
GTGATGAGCTGCTTCTCCTC    40333

**Primers 28'**

GAGGAGAAGCAGCTCATCAC    40310  
GTGTACACCTTCAACTGCAC    40453

**Primers 29**

CATAGAGCAAGGGACGGTG    41070  
TACTGTGGGAAGAGTAGCTC    41231

**Primers 30**

AGCGCTTTGTGCTCAGTGG    41835  
ATGACTCCTCTGTGTCAGTGA    41989

**Primers 30'**

TCCCCTGACTCACTGCTGG    41835  
ACACGGAGTGTCCCTCCTATG    42700

**Primers 31**

CATAGGAGGACACTCCGTGT    42681  
TACCCTTTTCCTTCCGGCTG    42857

**Primers 32**

GCAGTCCGCTCCAAGCTCT    44490  
GGCTGGAGAGGTTCCCAAAG    44810

**Primers 33**

TCCAAGCAGCACTAACCCTG    45900  
ACGTTGACCAGCTTCTGCCA    46039

**Primers 34**

GCTGAATGCTGTGCCTCTGG    47020  
CCATCAACCTGCTAGAGAAG    47318



**Primers 35**

CCCAGATTTGCTTCATCAGGAG 48560  
GAGATGTGATAACAGACTGCCA 48758

**Primers 36**

CACTTCTGCTCTACAAGGCC 49950  
ACTGACATGGAAACACACGG 50103

**Primers 37**

GCAGTGCAGACCCATCCCT 51170  
TCTTTCTGTGCGTCATCAGC 51455

**Primers 38**

CCAAGCAAGTCCAGACAGAG 52817  
GCAAGCCTACATTCCTCCC 52996

**Primers 39**

TCATGAACTCCCAGTACCAG 54424  
TGCACACTGATCAGTAGGTC 54567

**Primers LYS :**

CGGGTATCATTAGTGCCGAG  
CTGCCAGTATATCCTGGCAA
